# Supplementary material
Source: Springer Nature journal article supplement (https://www.springermedizin.de/resource/supplementary/12947_2004_33_MOESM1_ESM.pdf/9556040)

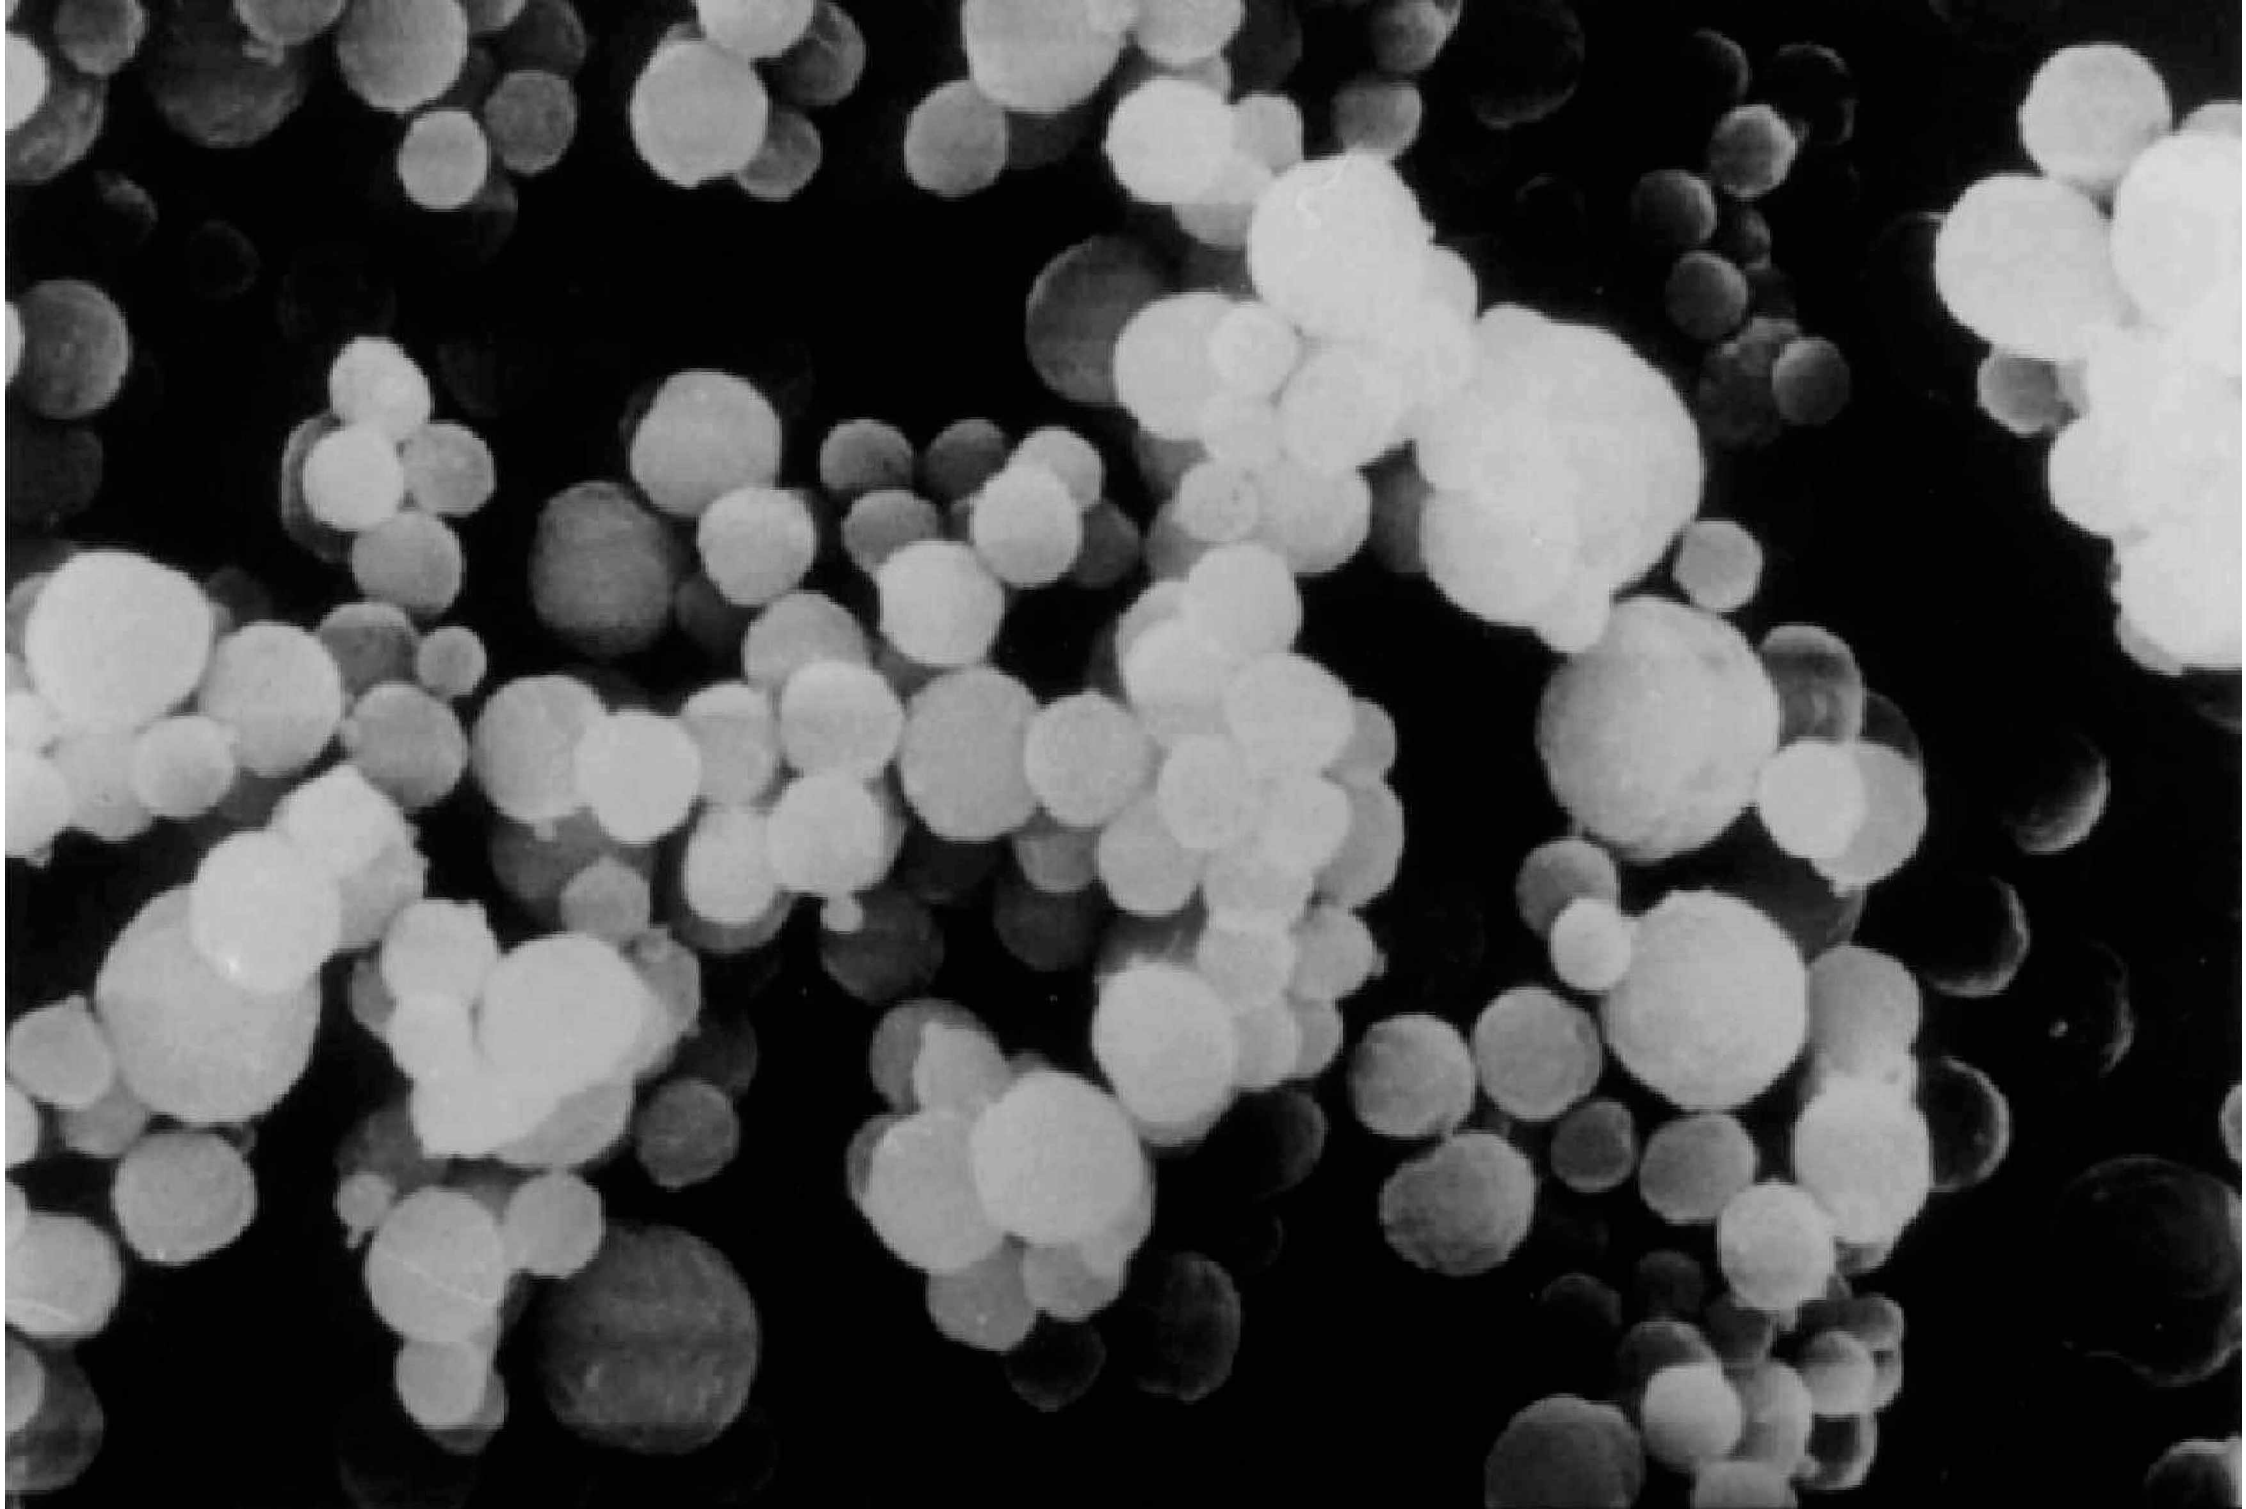

07735

3  $\mu\text{m}$

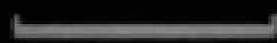

Supplement: MOESM1 [file 9556040]
